# Supplementary material for: The HOXD9-mediated PAXIP1-AS1 regulates gastric cancer progression through PABPC1/PAK1 modulation
Source: PubMed Central journal article supplement (PMC10209196; doi:10.1038/s41419-023-05862-5), 2023-05-24

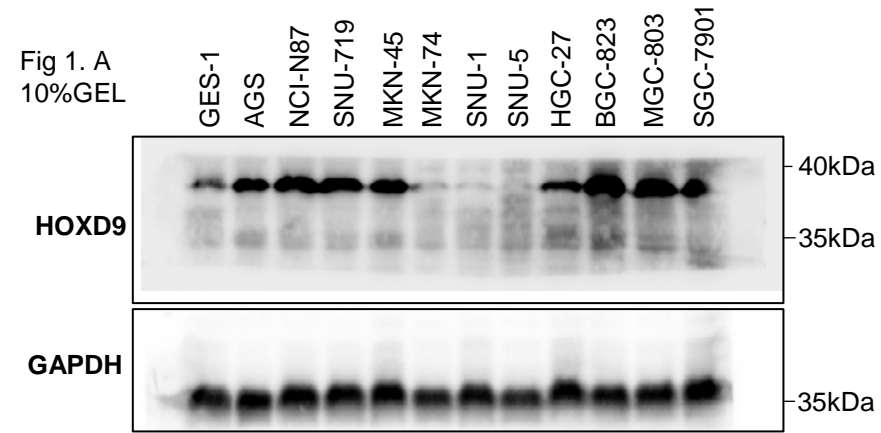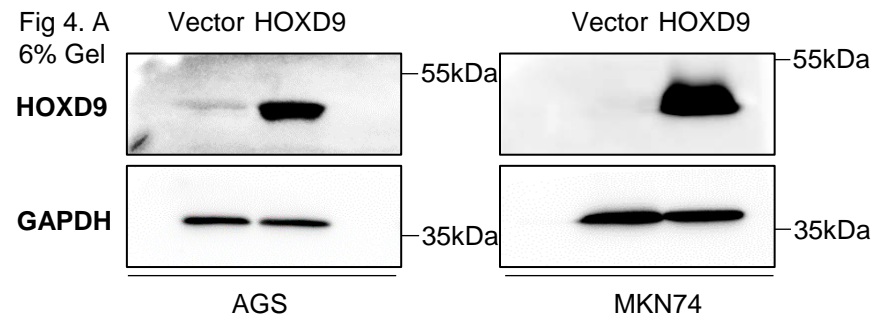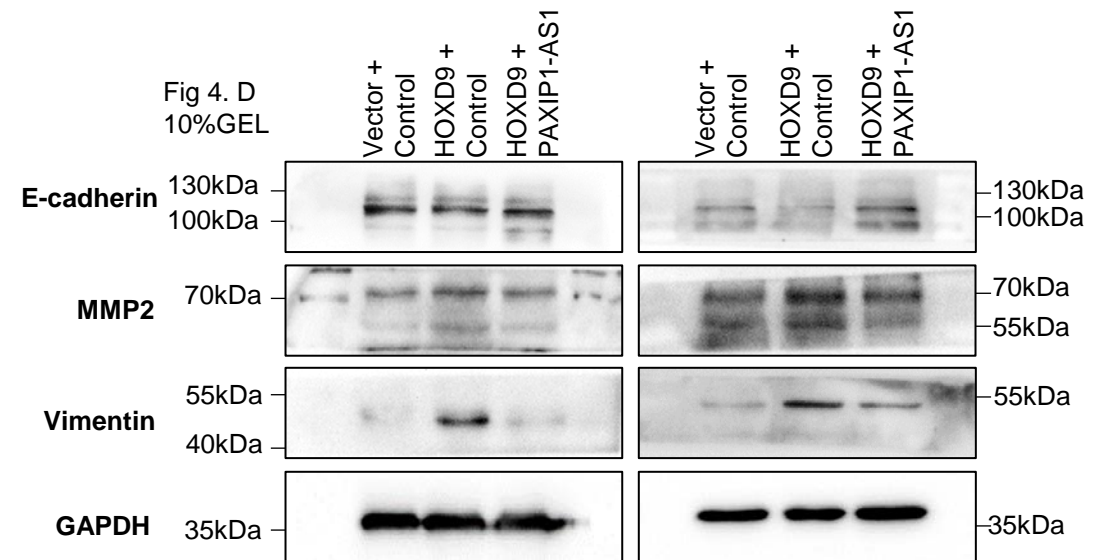

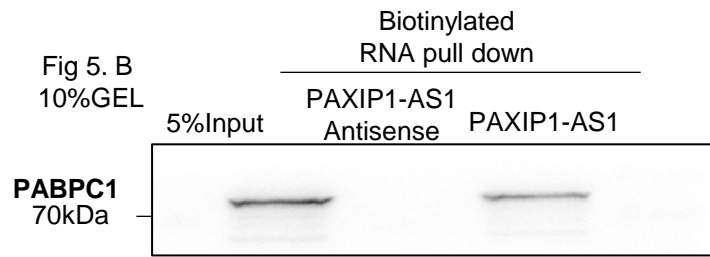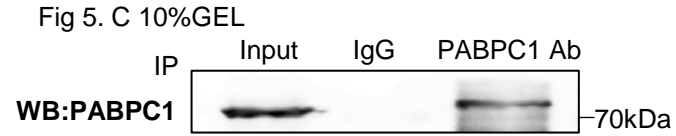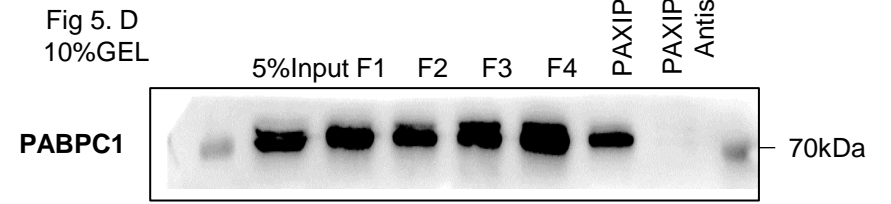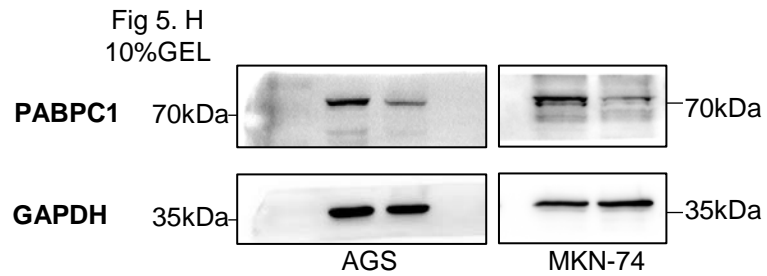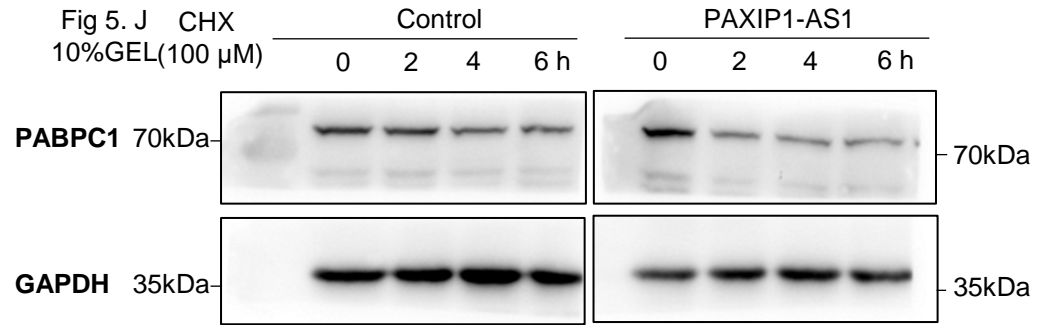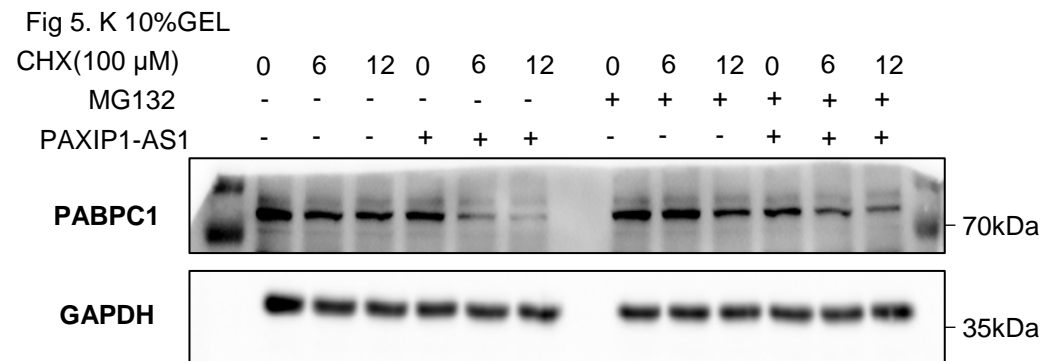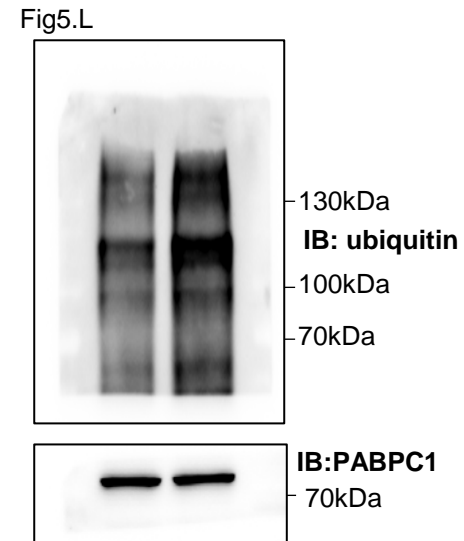

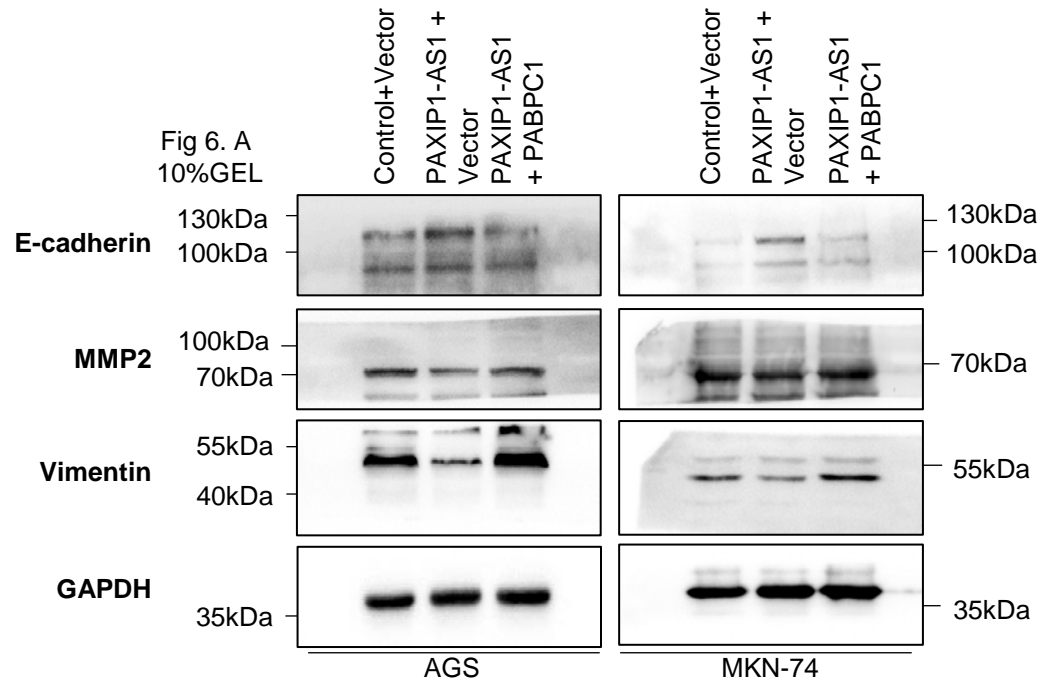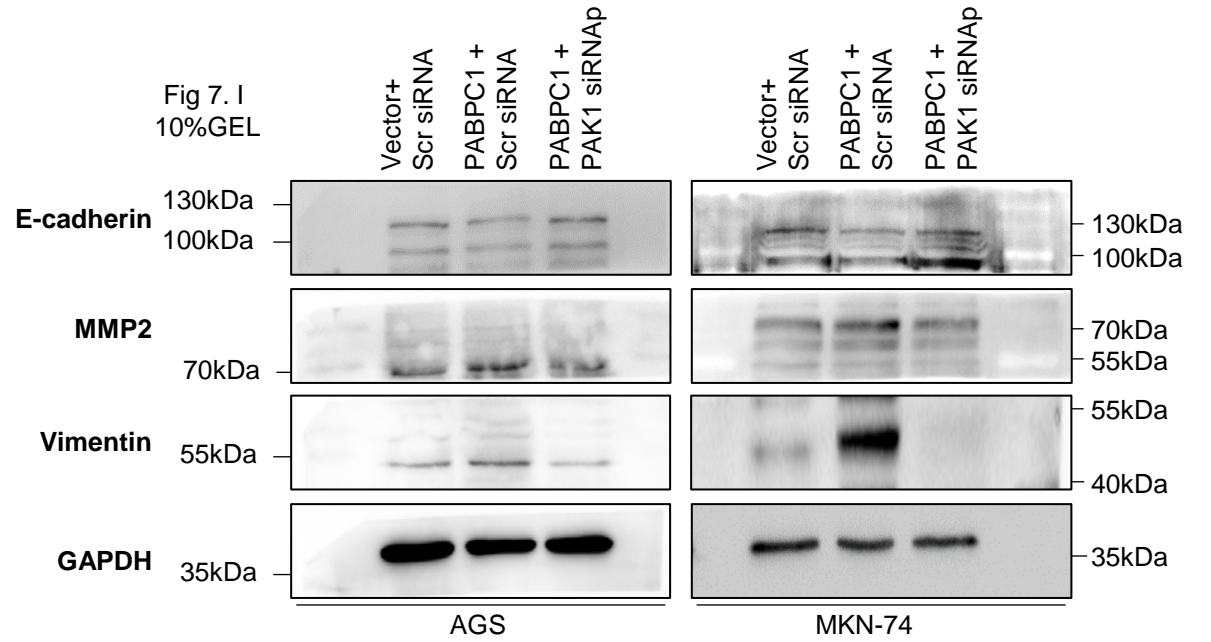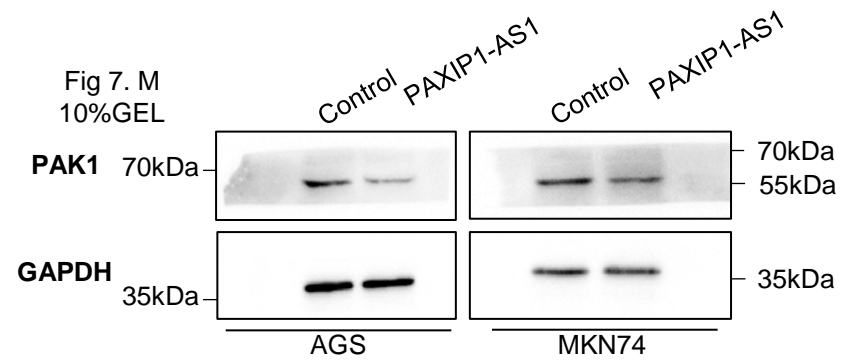

Fig 8. B 10%GEL

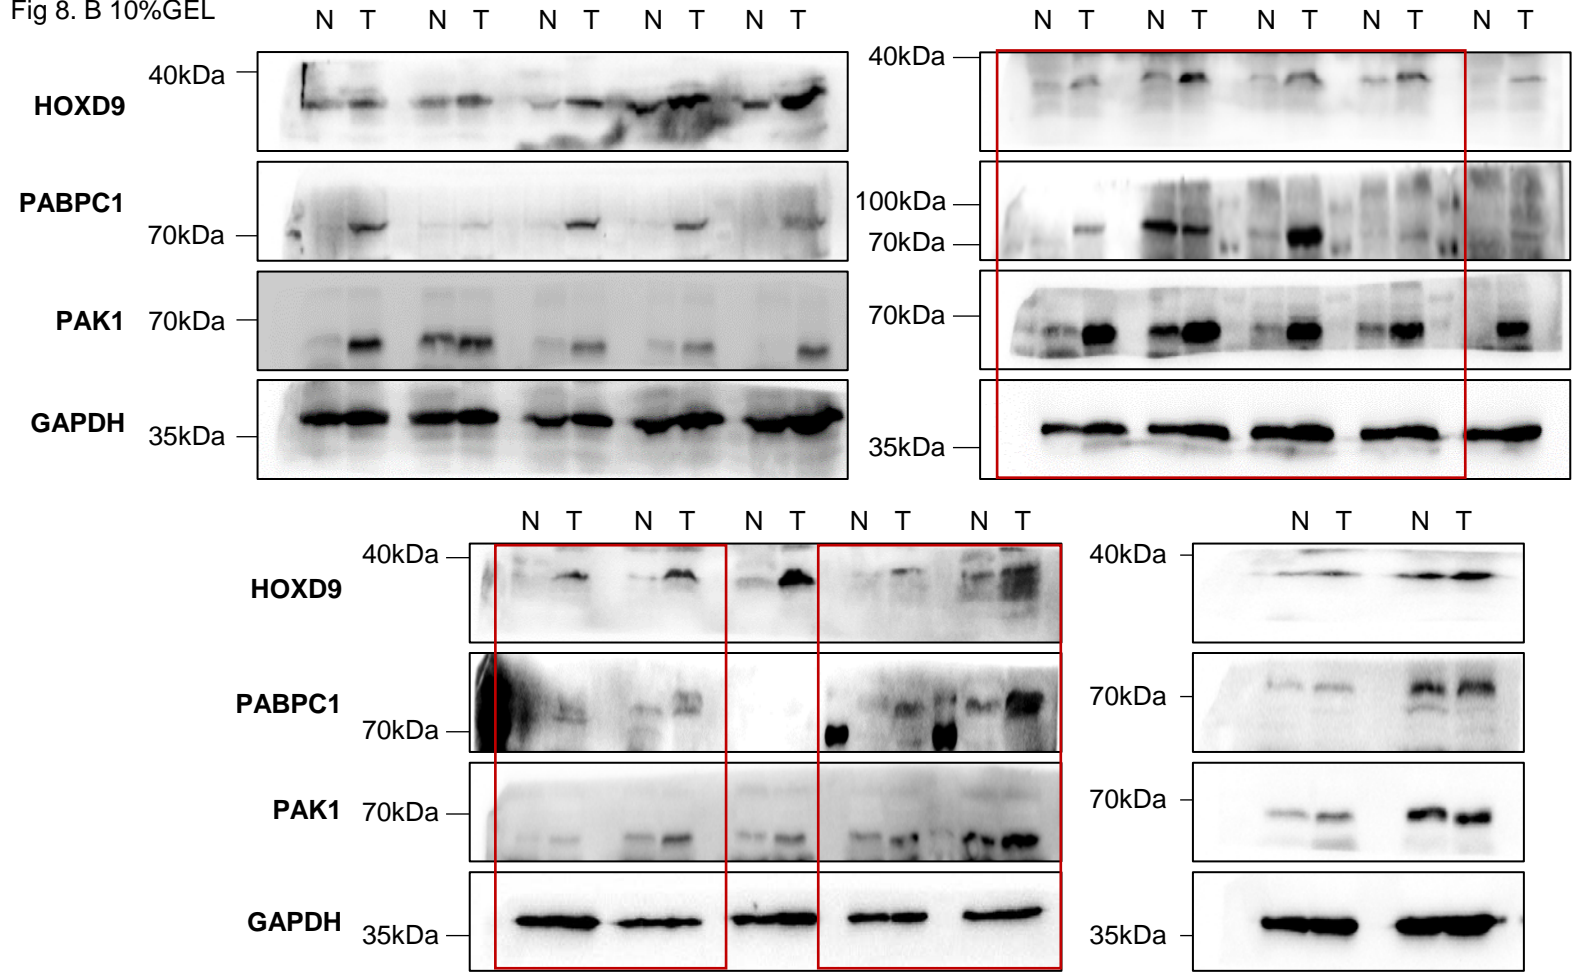

Fig 8. A 10%GEL

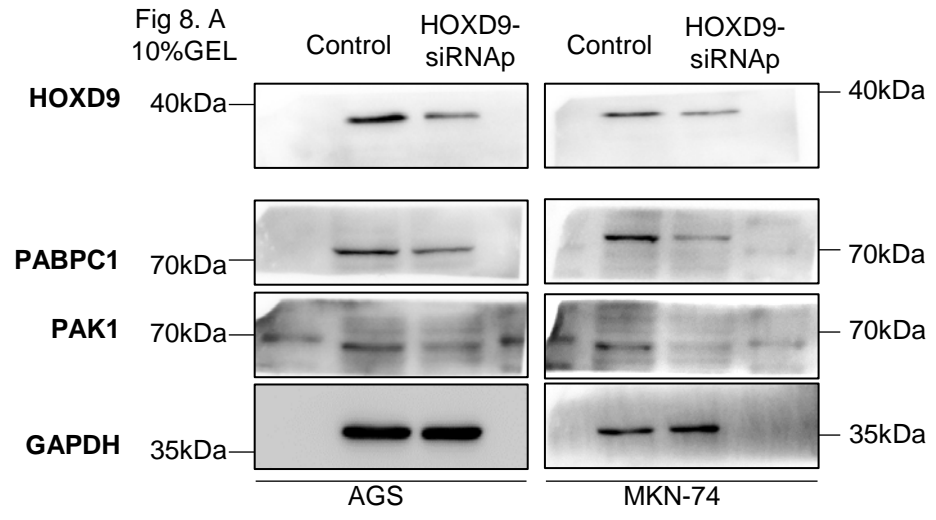

FigS5.B 15%GEL

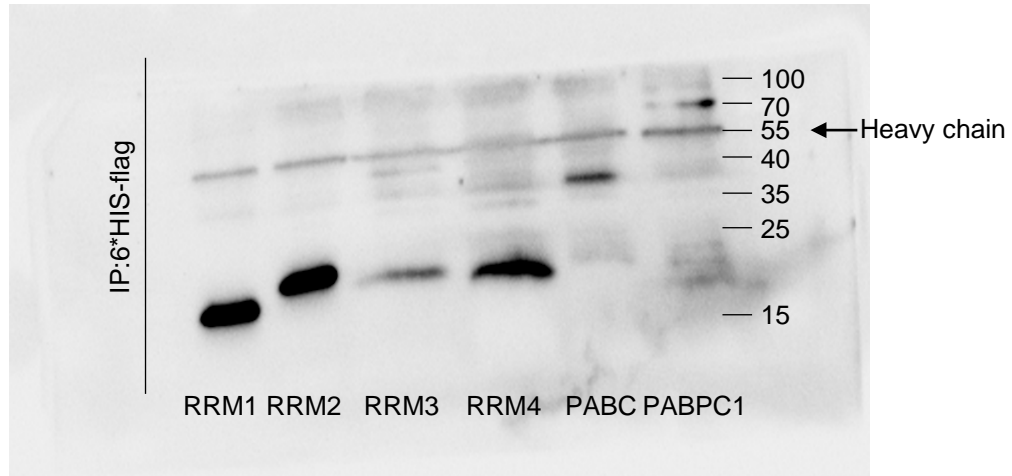

Fig S6. A  
10%GEL

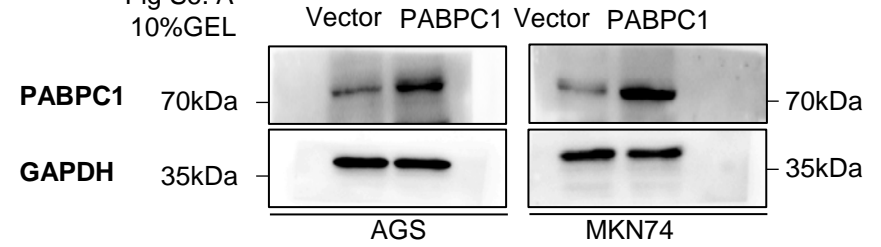

Fig S7. A  
10%GEL

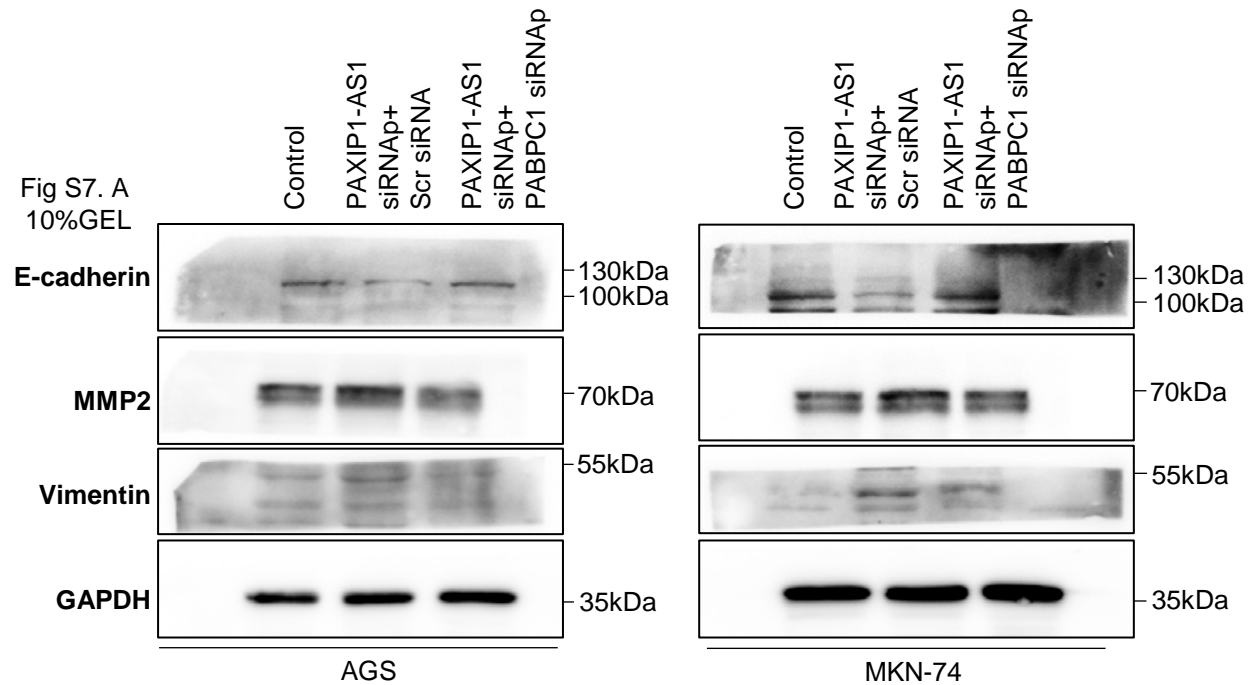

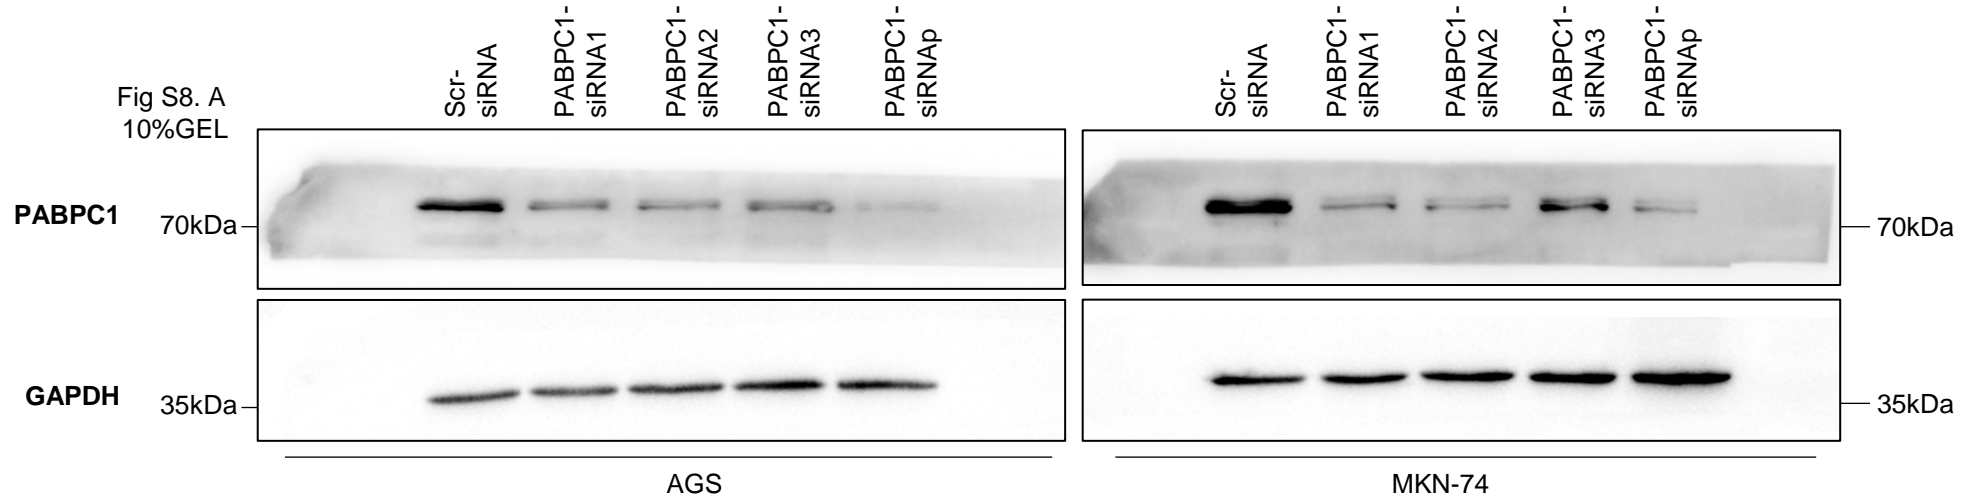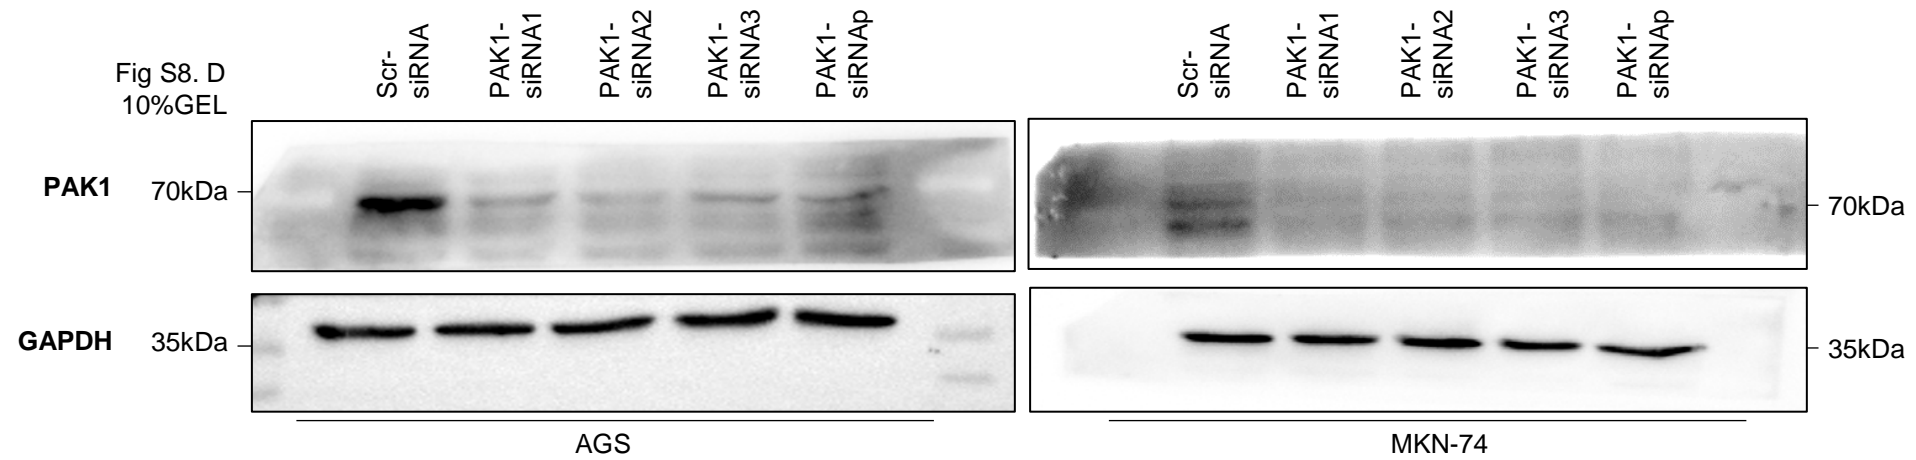

Supplement: 41419_2023_5862_MOESM12_ESM.pdf [file 41419_2023_5862_MOESM12_ESM.pdf]
